# Supplementary material for: Response of cell-free miRNAs to acute exercise: A systematic Review and Meta-Analysis
Source: bioRxiv or medRxiv preprint supplement (doi:10.1101/2022.12.20.22283756), 2025-09-23
Supplement: Supplementary file [file media-3.pdf]

## Title: The effect of acute exercise on circulating microRNAs: A Systematic Review

### Search strategy:

#### 1. Search two databases:

PUBMED, sport discuss

Search for the following terms within title/abstract:

- "Exercise" OR "physical activity"
- AND
- "Circulating" OR "plasma" OR "serum" OR "cell-free" OR "cell free" OR "exosome" OR "exosomal" OR "vesicular" OR "extra-cellular vesicle"
- AND
- "miRNA" OR "microRNA" OR "miR"

#### 2. Study selection:

PICO model:

|              |                                                                                                                                                                                 |
|--------------|---------------------------------------------------------------------------------------------------------------------------------------------------------------------------------|
| Population   | Age: 18-45 yr<br>Healthy: <ul style="list-style-type: none"><li>- BMI &lt; 30 kg/m<sup>2</sup></li><li>- Free from known cardiac disease, metabolic disease or cancer</li></ul> |
| Intervention | Acute exercise (any duration/modality)                                                                                                                                          |
| Comparison   | Pre and ≤ 48 hr post exercise                                                                                                                                                   |
| Outcome      | Circulating miRNA (serum/plasma/exosomes)                                                                                                                                       |

Additional criteria:

- Human
- Peer reviewed, published, original research article

Check references of included studies afterwards for relevant articles.

#### 3. Data extraction:

Set out data extraction headings a priori.
