# Supplementary material for: Response of cell-free miRNAs to acute exercise: A systematic Review and Meta-Analysis
Source: bioRxiv or medRxiv preprint supplement (doi:10.1101/2022.12.20.22283756), 2025-09-23
Supplement: Supplementary file [file media-4.pdf]

#### Domain 1- Confounding:

- Baseline confounding: Can we say they have a similar baseline based on following characteristics:
  - Age,
  - BMI,
  - Sex,
  - Menstrual cycle (if female),
  - Fitness status.
- Time varying confounding, based on the following:
  - Fasting duration of > 8 hr.
  - Diet control
  - Exercise controlled in 24 hr prior to testing

#### Domain 2- Selection of participants:

- Was selection into study based on participant characteristics after start of intervention.
- Given the nature of included studies intervention's, most studies will be LOW for domain.
- Excluding participants based on serum or miRNA QC are irrelevant in this domain, as per guidance doc- "selection bias occurs when selection of participants is related to both intervention and outcome".

#### Domain 3- Classification of intervention:

- Study provides clear details of the following exercise intervention parameters:
  - Type
  - Dose
  - Frequency
  - Intensity and/ or duration

#### Domain 4- Deviations from intended interventions:

- Was there sufficient control for implementation of the intended treatment protocol? Consider whether there was sufficient control of the following:
  - Exercise intensity (Rate of Perceived Exertion (RPE), Heart Rate, or was intensity controlled between participants).
  - Exercise duration.
  - Time of day participants
- Co-interventions that apply to pre and post intervention timepoint. Consider the following:

- Fasting duration of > 8 hr or controlled diet night before or morning of intervention
- Exercise controlled in 24 hr prior to testing.
- Are N values provided to confirm the intervention was successful in all participants?

#### Domain 5- Missing data:

- Consider the following:
  - Was there any missing data?
  - Were N values provided in tables/graphs?
  - Were reasons provided for missing data?
  - How was missing data dealt with?

#### Domain 6- Measurement of outcomes:

- Where outcome measures influenced by knowledge of intervention (i.e timepoint?)
- Was the blood sampling timepoint and time of collection similar between all participants?
- Due to the objective nature of assessment of miRNA expression, most studies will score low for this domain.

#### Domain 7- Selected of reported result:

- Was there selective reporting of results (did they run the stats in multiple way to get the "best" outcome)? Consider the following:
  - Have they stated the same technique in the methods as is reported in the results? (e.g. ddCt).
  - How were housekeeping genes selected? A priori? Using statistical test (e.g. normfinder)
  - Were corrections made for multiple analysis? (e.g. FDR).
