# Supplementary material for: Response of cell-free miRNAs to acute exercise: A systematic Review and Meta-Analysis
Source: bioRxiv or medRxiv preprint supplement (doi:10.1101/2022.12.20.22283756), 2025-09-23
Supplement: Supplementary file [file media-5.pdf]

## Supplementary File

### GRADE ASSESSMENT

| Outcomes   | Nº of studies              | Certainty of the evidence (GRADE)   |
|------------|----------------------------|-------------------------------------|
| miRNA-1    | (14 observational studies) | ⊕○○○<br>Very low <sup>a,b,c</sup>   |
| miRNA-133a | (14 observational studies) | ⊕○○○<br>Very low <sup>a,b,c</sup>   |
| miRNA-133b | (10 observational studies) | ⊕○○○<br>Very low <sup>a,b,c</sup>   |
| miRNA-206  | (8 observational studies)  | ⊕○○○<br>Very low <sup>a,b,c</sup>   |
| miRNA-146  | (9 observational studies)  | ⊕○○○<br>Very low <sup>a,b,c,d</sup> |
| miRNA-221  | (8 observational studies)  | ⊕○○○<br>Very low <sup>a,b,c</sup>   |
| miRNA-21   | (10 observational studies) | ⊕○○○<br>Very low <sup>a,b</sup>     |
| miRNA-126  | (7 observational studies)  | ⊕○○○<br>Very low <sup>a,b,c</sup>   |
| miRNA-208  | (6 observational studies)  | ⊕○○○<br>Very low <sup>a,b,c</sup>   |
| miRNA-210  | (5 observational studies)  | ⊕○○○<br>Very low <sup>a,b,c</sup>   |
| miRNA-222  | (8 observational studies)  | ⊕○○○<br>Very low <sup>a,b,c,d</sup> |

a. Based on ROBINS-I tool (The proportion of information from studies at high risk of bias is sufficient to affect the interpretation of the results).

b. Was the  $I^2$  greater than 50% and  $p < 0.05$  indicating significant heterogeneity.

c. Large 95% confidence intervals and based on influential studies that could change the overall effect size.

d. Based on Funnel Plot and Eggers regression analysis.

## Explanations

### **GRADE Working Group grades of evidence**

**High certainty:** we are very confident that the true effect lies close to that of the estimate of the effect.

**Moderate certainty:** we are moderately confident in the effect estimate: the true effect is likely to be close to the estimate of the effect, but there is a possibility that it is substantially different.

**Low certainty:** our confidence in the effect estimate is limited: the true effect may be substantially different from the estimate of the effect.

**Very low certainty:** we have very little confidence in the effect estimate: the true effect is likely to be substantially different from the estimate of effect.
